# Supplementary material for: Assessment of Temporal Patterns and Patient Factors Associated With Oseltamivir Administration in Children Hospitalized With Influenza, 2007-2020
Source: PubMed Central journal article supplement (PMC9508650; doi:10.1001/jamanetworkopen.2022.33027), 2022-09-23
Supplement: jamanetwopen-e2233027-s001.pdf [file jamanetwopen-e2233027-s001.pdf]

## Supplementary Online Content

Walsh PS, Schnadower D, Zhang Y, Ramgopal S, Shah SS, Wilson PM. Assessment of temporal patterns and patient factors associated with oseltamivir administration in children hospitalized with influenza, 2007-2020. *JAMA Netw Open.* 2022;5(9):e2233027. doi:10.1001/jamanetworkopen.2022.33027

**eFigure.** Patterns in Oseltamivir Use Within Pediatric Age Groups

This supplementary material has been provided by the authors to give readers additional information about their work.

**eFigure.** Patterns in Oseltamivir Use Within Pediatric Age Groups

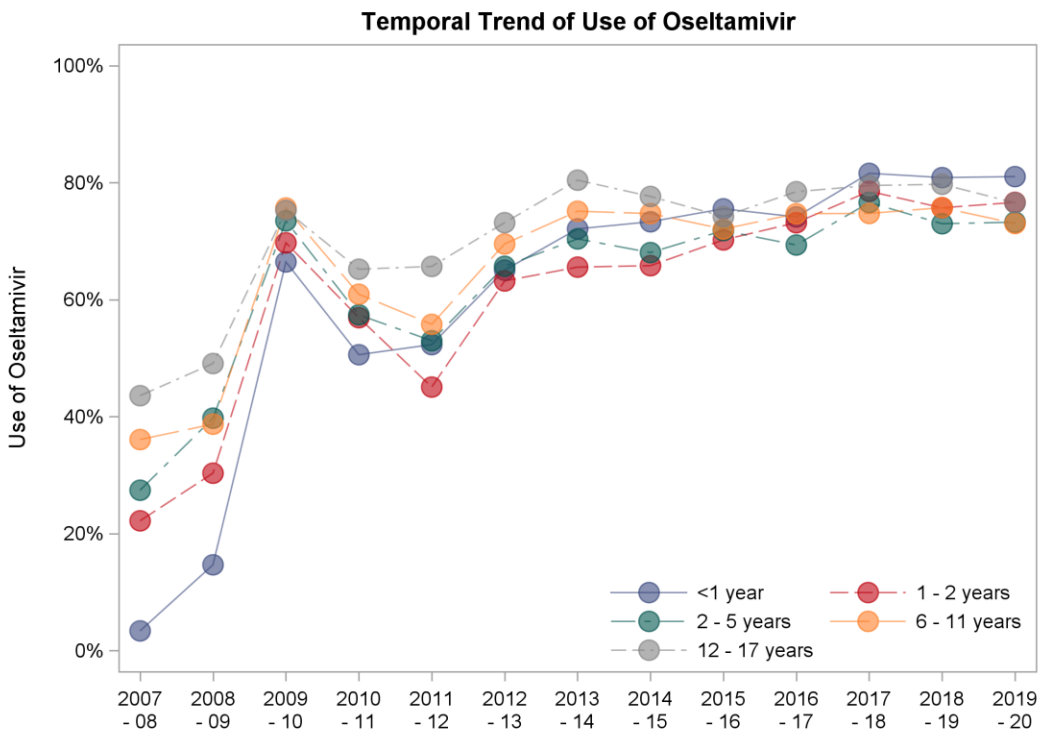

Oseltamivir use was very low in infants < 1 year of age prior to the emergency use authorization (EUA) by the US Food and Drug Administration in 2009.
